# Supplementary material
Source: ML conference proceedings conference paper supplement (https://openaccess.thecvf.com/content/CVPR_2019/html/Liu_Analysis_of_Feature_CVPR_2019_paper.html)
Supplement: Supplementary file 1 [file Liu_Analysis_of_Feature_CVPR_2019_supplemental.zip]

Archive with 3 entries (2 files):
- 4814-supp/
- 4814-supp/supplementary_materials_video.mp4
- 4814-supp/Supplementary_materials_for_Analysis_of_Feature_Visibility_in_Non_Line_of_Sight_Measurements.pdf
